# Supplementary material for: 2013–2019 increases of surface ozone pollution in China: anthropogenic and meteorological influences
Source: Copernicus journal article supplement (doi:10.5194/acp-2020-298), 2020-04-16
Supplement: Supplementary file 1 [file acp-2020-298-supplement.pdf]

*Supplement of*

**2013–2019 increases of surface ozone pollution in China: anthropogenic and meteorological influences**

**Ke Li et al.**

*Correspondence to:* Ke Li (keli@seas.harvard.edu)

**Table S1:** MDA8 ozone trends in China<sup>a</sup>

| Regions | JJA 2013–2019                               |                                |                                | JJA 2013–2017                  |                     |                                |
|---------|---------------------------------------------|--------------------------------|--------------------------------|--------------------------------|---------------------|--------------------------------|
|         | OBS                                         | MET                            | ANTH                           | OBS                            | MET                 | ANTH                           |
| China   | <b>1.9</b> ( <i>&lt;0.01</i> ) <sup>a</sup> | <b>0.7</b> ( <i>&lt;0.01</i> ) | <b>1.2</b> ( <i>&lt;0.01</i> ) | <b>1.7</b> ( <i>&lt;0.01</i> ) | 0.4 ( <i>0.22</i> ) | <b>1.3</b> ( <i>&lt;0.01</i> ) |
| NCP     | <b>3.3</b> ( <i>&lt;0.01</i> )              | <b>1.4</b> ( <i>0.02</i> )     | <b>1.9</b> ( <i>&lt;0.01</i> ) | <b>2.7</b> ( <i>0.01</i> )     | 0.7 ( <i>0.43</i> ) | <b>2.0</b> ( <i>&lt;0.01</i> ) |
| YRD     | <b>1.6</b> ( <i>&lt;0.01</i> )              | 0.7 ( <i>0.12</i> )            | <b>0.9</b> ( <i>&lt;0.01</i> ) | <b>1.7</b> ( <i>0.03</i> )     | 0.2 ( <i>0.82</i> ) | <b>1.5</b> ( <i>&lt;0.01</i> ) |
| PRD     | <b>1.1</b> ( <i>0.03</i> )                  | <b>0.8</b> ( <i>0.07</i> )     | 0.3 ( <i>0.29</i> )            | 0.6 ( <i>0.44</i> )            | 0.4 ( <i>0.65</i> ) | 0.3 ( <i>0.51</i> )            |
| SCB     | 0.7 ( <i>0.23</i> )                         | -0.2 ( <i>0.59</i> )           | <b>1.0</b> ( <i>&lt;0.01</i> ) | 0.9 ( <i>0.42</i> )            | 0.1 ( <i>0.90</i> ) | 0.8 ( <i>0.20</i> )            |

<sup>a</sup>Observed trends (OBS) are obtained by ordinary linear regression on summer (JJA) mean values of maximum daily 8-h average (MDA8) ozone measured at the sites of the Ministry of Ecology and Environment (MEE) network. The MDA8 ozone data are first averaged spatially over the  $0.5^\circ \times 0.625^\circ$  MERRA-2 grid (Figure 2), and then averaged nationally (China) and over four megacity clusters: North China Plan (NCP), Yangtze River Delta (YRD), Pearl River Delta (PRD), Sichuan Basin (SCB). Meteorologically-driven trends (MET) are obtained by fitting the ozone data to a multiple linear regression (MLR) model, and the anthropogenically-driven trends (ANTH) are obtained from the residual. P-values for the trends are in italics; trends in bold are those with p-value smaller than 0.1.

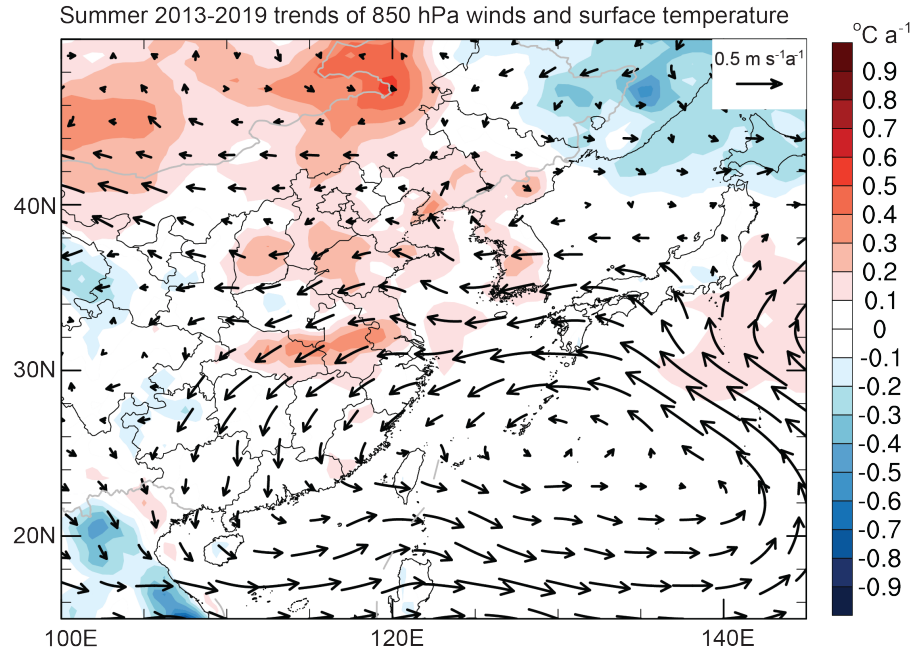

**Figure S1.** Summer mean trends of 850 hPa wind vectors ( $\text{m s}^{-1} \text{ a}^{-1}$ ) and surface daily maximum temperature ( $^{\circ}\text{C a}^{-1}$ , shaded) over the period 2013–2019. Data are from the MERRA-2 reanalysis.
